# Supplementary material for: Functional human GRIN2B promoter polymorphism and variation of mental processing speed in older adults
Source: PubMed Central journal article supplement (PMC5425128; doi:10.18632/aging.101228), 2017-04-24
Supplement: aging-09-1293-s001.pdf [file aging-09-1293-s001.pdf]

SUPPLEMENTARY MATERIAL

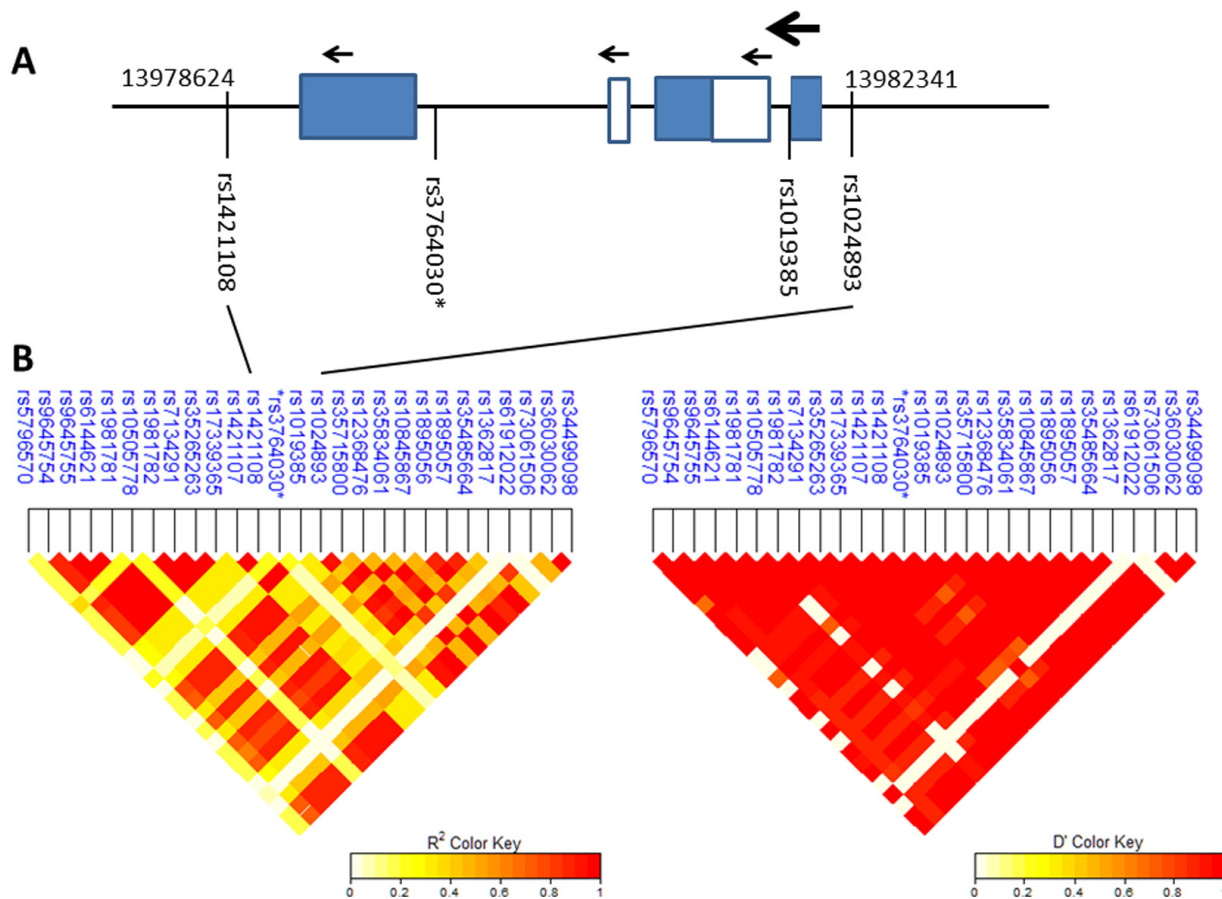

**Figure S1.** Panel (A) Schematic of the human *GRIN2B* gene showing locations of the first four non-coding exons and the 5' flanking region. SNP rs3764030 is shown with an asterisk. Boxes indicate the non-coding exons from *GRIN2B*. A major transcription start site in brain is shown by a large left-pointing arrow. Other transcription start sites are shown with smaller left-pointing arrows. The non-coding exons are known to undergo extensive alternative pre-mRNA splicing (shown as open boxes). Nucleotide positions from the reference sequence are shown above the horizontal line. Adapted from NCBI: www.ncbi.nlm.nih.gov RefSeqGene NG\_031854.1. *GRIN2B* markers used in linkage equilibrium (LD) analysis are indicated by their dbSNP rs identifier. Orientation of the map is shown with transcription proceeding from right to left. Panel (B) Pairwise LD relationships for 27 markers in the CEU population with values shown in color below the *GRIN2B* gene map:  $R^2$  (left) and  $D'$  (right). Bright red indicates a region of high LD ( $R^2 > 0.8$ ,  $D' > 0.8$ ) with yellow indicating areas of lower LD. The Lowest LD ( $R^2 < 0.1$ ,  $D' < 0.1$ ) are shown in white. Over the entire 20 kb region,  $R^2$  was low while  $D'$  was high.
